# Supplementary material for: Dynamic monitoring of the light-soaking effect of organic–inorganic perovskite solar cells doped with alkali metal ions
Source: Royal Society of Chemistry journal article supplement (doi:10.1039/d4tc02408g), 2024-01-01
Supplement: d4tc02408g1.pdf [file d4tc02408g1.pdf]

## Supporting information

### Dynamic monitoring of light soaking effect of organic-inorganic perovskite solar cells doped with alkali metal ions

Qianwen Wei<sup>1§</sup>, Guijun Zhang<sup>1§</sup>, Guangsheng Liu<sup>1</sup>, Tahmineh Mahmoodi<sup>2</sup>, Qi Li<sup>2</sup>, Junlin Lu<sup>2</sup>,  
JingJing Luo<sup>1</sup>, Qisong Feng<sup>1</sup>, Juan Wang<sup>1</sup>, Baohua Jia<sup>\*2</sup>, Yu Yang<sup>\*1</sup>, Xiaoming Wen<sup>\*2</sup>

<sup>1</sup> National Center for International Research on Photoelectric and Energy Materials, School of Materials and Energy, Yunnan University, Kunming 650091, China.

<sup>2</sup> School of Science, RMIT University, Melbourne, VIC 3000, Australia

§: these authors contribute equally to this work.

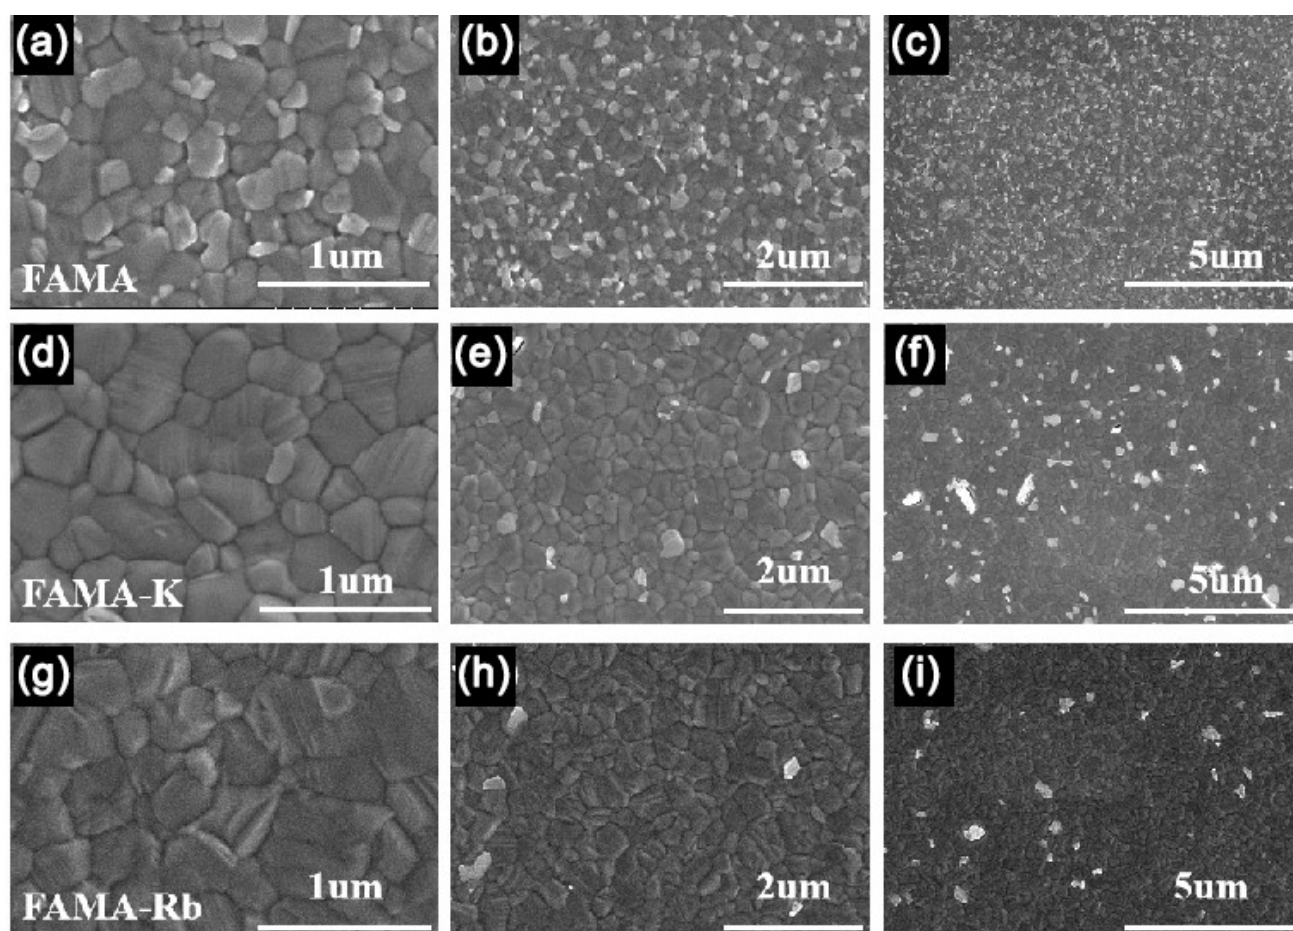

Figure S1 SEM images of perovskite thin films regulated by different alkali metal ions. (a)-(c) represent FAMA, (d)-(f) represent FAMA-K, and (g)-(i) represent FAMA-Rb.

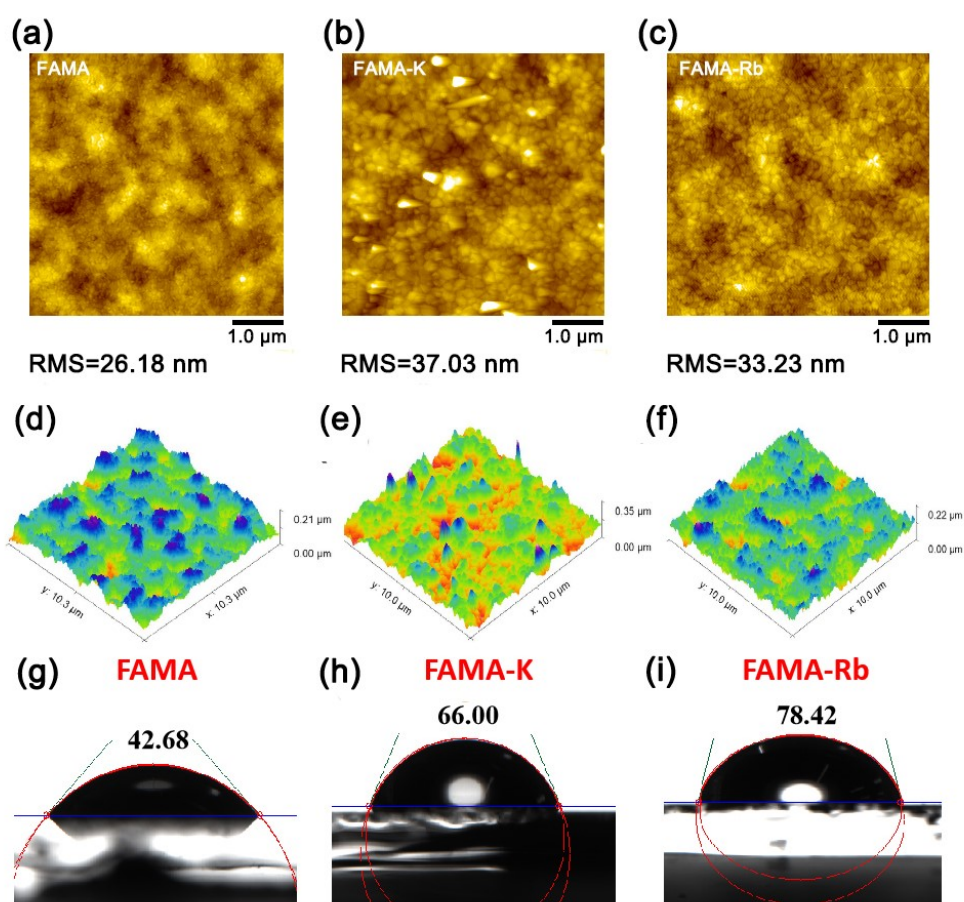

Figure S2 Atomic force microscope 2D images of (a) FAMA, (b) FAMA-K and (c) FAMA-Rb. Atomic force microscope 3D images of (d) FAMA, (e) FAMA-K and (f) FAMA-Rb. Contact angle test images of (g) FAMA, (h) FAMA-K and (i) FAMA-Rb.

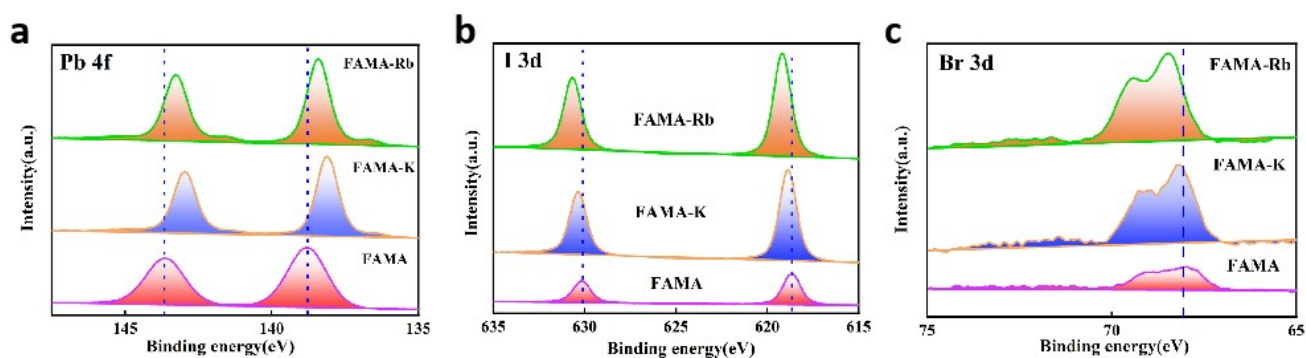

Figure S3 XPS pattern of FAMA, FAMA-K and FAMA-Rb.

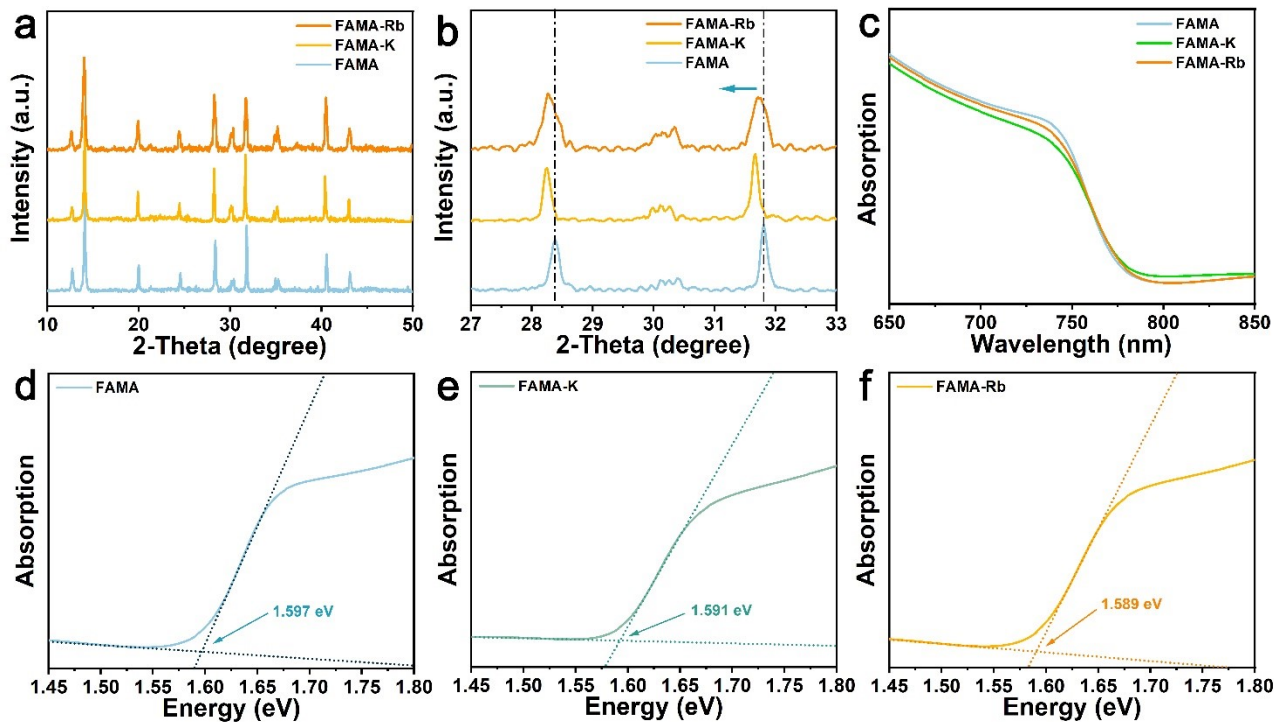

Figure S4 (a) XRD patterns and (b) shift in amplifying peaks for FAMA and alkali metal ions doped FAMA films. (c) UV-Vis spectra of FAMA film and alkali metal ions doped FAMA films. The tauc plots  $((ah\nu)^2 \sim h\nu)$  of (d) FAMA, (e) FAMA-K and (f) FAMA-Rb perovskite film.

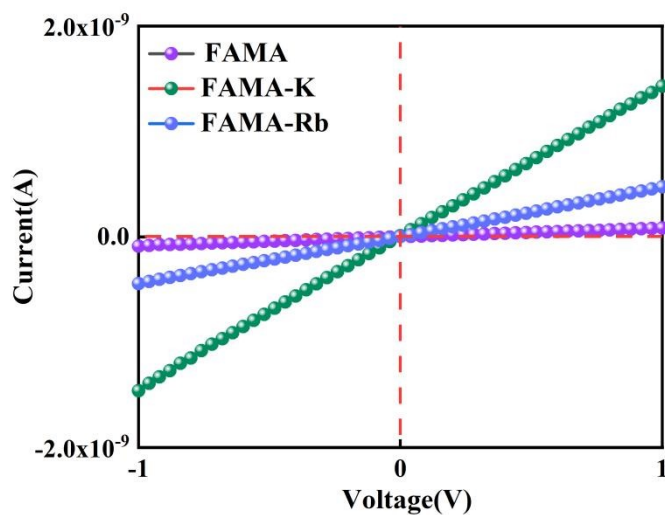

Figure S5 I-V curves of perovskite films doped by alkali metal ions.

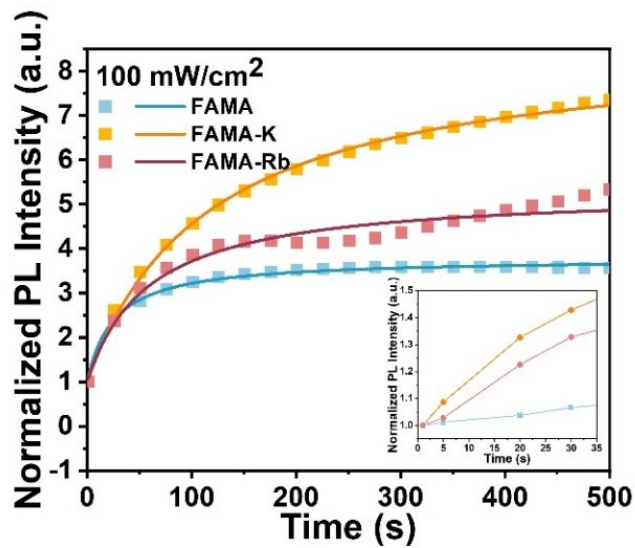

Figure S6 The normalized change curves of PL intensity and fitting curves of PL enhancement saturation time for FAMA, FAMA-K and FAMA-Rb perovskite films were obtained under continuous illumination with an intensity of 100 mW/cm<sup>2</sup>. The inset shows an enlarged PL intensity spectrum over 30 s. These curves were extracted from the 3D contour mapping of PL intensity at a specific wavelength corresponding to the perovskite bandgap.

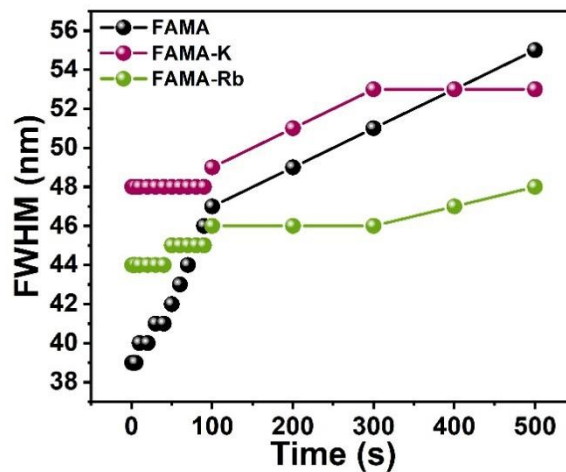

Figure S7 The time-dependent FWHM of PL peak of FAMA, FAMA-K and FAMA-Rb perovskite film.

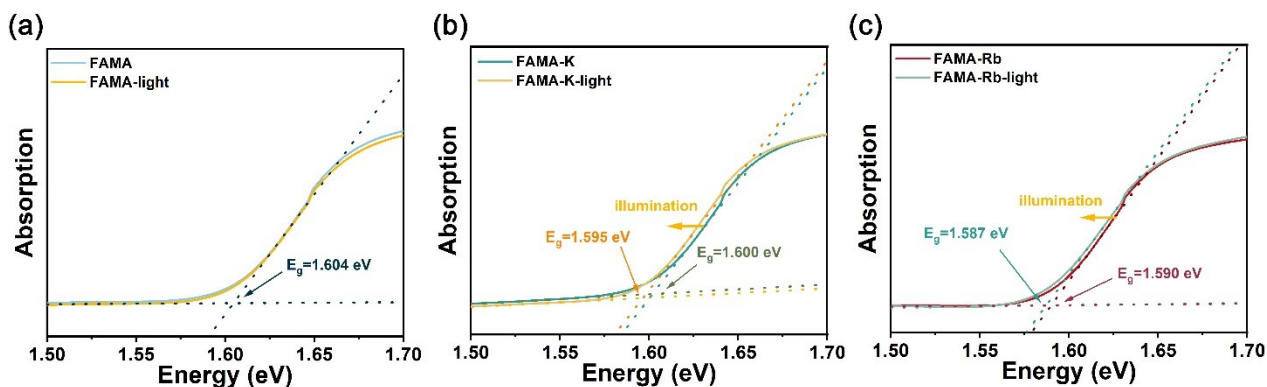

Figure S8 Tauc plots ( $(\alpha h\nu)^2 \sim h\nu$ ) of (a) FAMA, (b) FAMA-K, and (c) FAMA-Rb perovskite films.

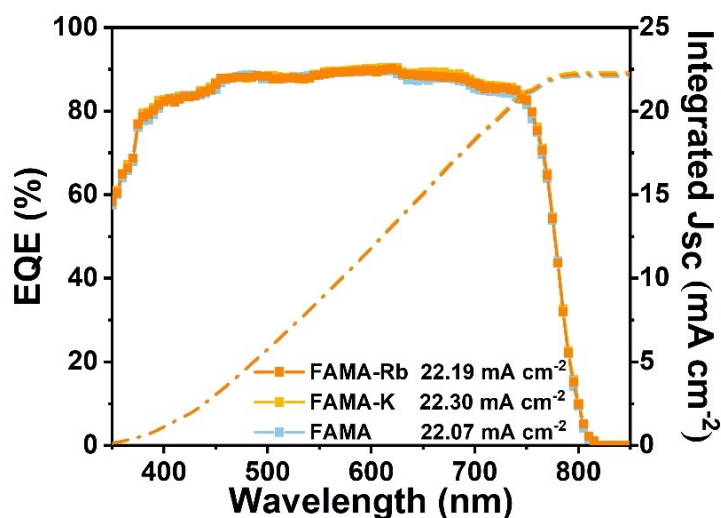

Figure S9 The EQE spectra of FAMA, FAMA-K and FAMA-Rb PSCs.

Table S1 Fitting parameters of for time resolved photoluminescence decay with an excitation of 10 W/cm<sup>2</sup>. Bi-exponential decay models was used for FAMA perovskites. The values in parenthesis indicate proportion of each decay component.

|      | Time (s) | A <sub>1</sub>   | τ <sub>1</sub> | A <sub>2</sub>   | τ <sub>2</sub> | Effective lifetime (ns) |
|------|----------|------------------|----------------|------------------|----------------|-------------------------|
| FAMA | 100      | 5.18<br>(0.9435) | 1.78           | 0.31<br>(0.0565) | 262.74         | 16.51                   |
|      | 200      | 2.21             | 2.36           | 0.35             | 278.27         | 40.08                   |

|     |                  |      |                  |        |        |
|-----|------------------|------|------------------|--------|--------|
|     | (0.8633)         |      | (0.1367)         |        |        |
| 300 | 0.75<br>(0.6696) | 4.11 | 0.37<br>(0.3304) | 300.42 | 101.99 |
| 400 | 0.32<br>(0.4324) | 8.71 | 0.42<br>(0.5676) | 341.25 | 197.44 |
| 500 | 0.38<br>(0.4691) | 7.14 | 0.43<br>(0.5309) | 328.87 | 177.93 |

Table S2 Fitting parameters of for time resolved photoluminescence decay with an excitation of 10 W/cm<sup>2</sup>. Bi-exponential decay models was used for FAMA-K perovskites. The values in parenthesis indicate proportion of each decay component.

|        | Time (s) | A <sub>1</sub>   | $\tau_1$ | A <sub>2</sub>   | $\tau_2$ | Effective lifetime (ns) |
|--------|----------|------------------|----------|------------------|----------|-------------------------|
| FAMA-K | 100      | 0.52<br>(0.6190) | 5.38     | 0.32<br>(0.3810) | 295.02   | 115.71                  |
|        | 200      | 0.35<br>(0.4861) | 9.24     | 0.37<br>(0.5139) | 334.4    | 175.85                  |
|        | 300      | 0.32<br>(0.4384) | 10.07    | 0.41<br>(0.5616) | 359      | 206.04                  |
|        | 400      | 0.3<br>(0.4348)  | 10.31    | 0.39<br>(0.5652) | 366.19   | 211.45                  |
|        | 500      | 0.28<br>(0.4058) | 11.8     | 0.41<br>(0.5942) | 383.3    | 232.54                  |

Table S3 Fitting parameters of for time resolved photoluminescence decay with an excitation of 10 W/cm<sup>2</sup>. Bi-exponential decay models was used for FAMA-Rb perovskites. The values in parenthesis indicate proportion of each decay component.

|         | Time (s) | A <sub>1</sub>     | $\tau_1$ | A <sub>2</sub>   | $\tau_2$ | Effective lifetime (ns) |
|---------|----------|--------------------|----------|------------------|----------|-------------------------|
| FAMA-Rb | 100      | 0.3814<br>(0.4524) | 13.82    | 0.46<br>(0.5476) | 190.99   | 212.07                  |
|         | 200      | 0.3512             | 18.85    | 0.52             | 355.32   | 284.22                  |

|     |          |       |          |        |        |
|-----|----------|-------|----------|--------|--------|
|     | (0.4023) |       | (0.5977) |        |        |
| 300 | 0.3502   | 20.99 | 0.56     | 440.58 | 333.27 |
|     | (0.3846) |       | (0.6154) |        |        |
| 400 | 0.3574   | 22.36 | 0.59     | 499.95 | 372.38 |
|     | (0.3723) |       | (0.6277) |        |        |
| 500 | 0.3577   | 23.63 | 0.62     | 558.37 | 426.01 |
|     | (0.3608) |       | (0.6392) |        |        |

Table S4 The performance parameters of PSCs based on FAMA under continuously light illumination.

|      | Time (h) | Sweep | $J_{sc}$<br>(mA cm <sup>-2</sup> ) | $V_{oc}$ (V) | FF   | PCE (%) |
|------|----------|-------|------------------------------------|--------------|------|---------|
| FAMA | 0        | FS    | 22.67                              | 1.037        | 0.72 | 17.15   |
|      |          | RS    | 22.72                              | 1.047        | 0.73 | 17.56   |
|      | 24       | FS    | 22.52                              | 1.035        | 0.70 | 16.50   |
|      |          | RS    | 22.60                              | 1.042        | 0.73 | 17.42   |
|      | 48       | FS    | 22.46                              | 1.020        | 0.68 | 15.58   |
|      |          | RS    | 22.50                              | 1.031        | 0.69 | 16.03   |

Table S5 The performance parameters of PSCs based on FAMA-K under continuously light illumination.

|        | Time (h) | Sweep | $J_{sc}$<br>(mA cm <sup>-2</sup> ) | $V_{oc}$ (V) | FF   | PCE (%) |
|--------|----------|-------|------------------------------------|--------------|------|---------|
| FAMA-K | 0        | FS    | 22.74                              | 1.067        | 0.75 | 18.10   |
|        |          | RS    | 22.84                              | 1.075        | 0.76 | 18.66   |
|        | 24       | FS    | 22.79                              | 1.081        | 0.76 | 18.88   |
|        |          | RS    | 22.89                              | 1.090        | 0.78 | 19.50   |
|        | 48       | FS    | 22.80                              | 1.085        | 0.76 | 18.96   |
|        |          | RS    | 22.87                              | 1.092        | 0.77 | 19.27   |

Table S6 The performance parameters of PSCs based on FAMA-Rb under continuously light illumination

|  | Time (h) | Sweep | $J_{sc}$ | $V_{oc}$ (V) | FF | PCE (%) |
|--|----------|-------|----------|--------------|----|---------|
|--|----------|-------|----------|--------------|----|---------|

|         |    | (mA cm <sup>-2</sup> ) |       |       |      |       |
|---------|----|------------------------|-------|-------|------|-------|
| FAMA-Rb | 0  | FS                     | 22.72 | 1.071 | 0.75 | 18.27 |
|         |    | RS                     | 22.77 | 1.077 | 0.75 | 18.63 |
|         | 24 | FS                     | 22.62 | 1.056 | 0.73 | 17.48 |
|         |    | RS                     | 22.65 | 1.063 | 0.72 | 17.41 |
|         | 48 | FS                     | 22.64 | 1.067 | 0.74 | 18.00 |
|         |    | RS                     | 22.70 | 1.072 | 0.73 | 17.94 |
